# Supplementary material for: Ruxolitinib as a Novel Therapeutic Option for Poor Prognosis T-LBL Pediatric Patients
Source: MDPI journal article supplement (doi:10.3390/cancers13153724), 2021-07-24
Supplement: s1 [file s1]

# Supplementary Material: Ruxolitinib as a Novel Therapeutic Option for Poor Prognosis T-LBL Pediatric Patients

Giulia Veltri, Chiara Silvestri, Ilaria Galligani, Max Sandei, Sara Vencato, Federica Lovisa, Giuliana Cortese, Marta Pillon, Elisa Carraro, Silvia Bresolin, Alessandra Biffi, Giuseppe Basso, Benedetta Accordi, Lara Mussolin and Valentina Serafin

**Table S1.** Patients characteristics.

| Code     | Sex | Age   | Stage | PTEN mut | FBXW7 mut | NOTCH1 mut | Event | % Blasts | Immunophenotype | Complete remission | Protocol |
|----------|-----|-------|-------|----------|-----------|------------|-------|----------|-----------------|--------------------|----------|
| T-LBL 1  | M   | 9,68  | IV    | 0        | 0         | 1          | 0     | 0,4      | T-LBL           | induction          | LNH-97   |
| T-LBL 3  | M   | 4,21  | III   | 0        | 0         | 0          | 1     | na       | T-LBL           | not achieved       | EuroLB02 |
| T-LBL 4  | M   | 15,36 | III   | 0        | 0         | 0          | 0     | na       | T-LBL           | consolidation      | LNH-97   |
| T-LBL 8  | M   | 10,56 | III   | 0        | 0         | 1          | 1     | na       | T-LBL           | not achieved       | LNH-97   |
| T-LBL 10 | F   | 16,56 | III   | 0        | 0         | 1          | 0     | na       | T-LBL           | consolidation      | LNH-97   |
| T-LBL 11 | M   | 14,57 | III   | 0        | 0         | 0          | 1     | na       | preB            | re-induction       | LNH-97   |
| T-LBL 12 | M   | 9,28  | IV    | 0        | 0         | 1          | 0     | 0,12     | T-LBL           | consolidation      | LNH-97   |
| T-LBL 13 | F   | 12,05 | IV    | 0        | 0         | 1          | 0     | na       | T-LBL           | maintainance       | LNH-97   |
| T-LBL 14 | M   | 9,07  | III   | 0        | 0         | 1          | 1     | na       | T-LBL           | not achieved       | EuroLB02 |
| T-LBL 15 | M   | 9,60  | IV    | 0        | 0         | 0          | 0     | na       | T-LBL           | induction          | EuroLB02 |
| T-LBL 16 | M   | 15,90 | III   | 0        | 0         | 0          | 1     | 0,13     | T-LBL           | not achieved       | EuroLB02 |
| T-LBL 17 | M   | 7,24  | III   | 1        | 0         | 0          | 0     | na       | T-LBL           | induction          | EuroLB02 |
| T-LBL 18 | F   | 15,95 | III   | 0        | 0         | 0          | 1     | na       | T-LBL           | not achieved       | EuroLB02 |
| T-LBL 19 | M   | 8,38  | IV    | 0        | 0         | 1          | 0     | 0,25     | T-LBL           | consolidation      | EuroLB02 |
| T-LBL 20 | M   | 14,20 | III   | 0        | 0         | 0          | 0     | na       | T-LBL           | induction          | EuroLB02 |
| T-LBL 21 | M   | 3,06  | III   | 0        | 0         | 1          | 0     | na       | T-LBL           | induction          | EuroLB02 |
| T-LBL 22 | M   | 11,17 | III   | 0        | 1         | 1          | 0     | na       | T-LBL           | induction          | EuroLB02 |
| T-LBL 26 | M   | 3,27  | IV    | 0        | 0         | 0          | 0     | 0,13     | T-LBL           | consolidation      | EuroLB02 |
| T-LBL 27 | M   | 12,16 | III   | 0        | 0         | 1          | 0     | na       | T-LBL           | not achieved       | EuroLB02 |
| T-LBL 28 | M   | 13,92 | III   | 0        | 0         | 1          | 0     | na       | T-LBL           | induction          | EuroLB02 |
| T-LBL 29 | M   | 9,45  | IV    | 0        | 1         | 1          | 1     | na       | T-LBL           | consolidation      | LNH-97   |
| T-LBL 30 | F   | 18,53 | IV    | 1        | 0         | 0          | 0     | 0,21     | T-LBL           | re-induction       | LNH-97   |

**Table S2.** List of  $q$ -values and local FDR. List of significant differentially activated or expressed proteins between T-LBL patients with poor and good prognosis. Non parametric two-sample Wilcoxon tests (Mann-Whitney tests) were applied to find Multiplicity corrections were applied following two well-known methods: Storey's false discovery rate (qvalue) and Storey's local false discovery rate (local FDR)<sup>22</sup>.

| Proteins            | $q$ -values | Local FDR   |
|---------------------|-------------|-------------|
| PRAS40 T246         | 0.24889765  | 0.032497619 |
| c-MYC               | 0.024889765 | 0.044911494 |
| JAK2 Y1007-1008     | 0.024889765 | 0.044911494 |
| BCL-XL              | 0.036778169 | 0.078696905 |
| BAX                 | 0.036778169 | 0.078696905 |
| P27 <sup>Kip1</sup> | 0.036778169 | 0.078696905 |
| PKCA T505           | 0.096783894 | 0.135361967 |
| STAT6 Y641          | 0.103353231 | 0.148523881 |

**Table S3.** List of primary antibodies selected for RPPA staining. Each antibody was previously validated for single band specificity by Western Blot. Proteins to be analyzed in this study were chosen because belonging to the AKT/mTOR, JAK/STAT, RAS/MAPK, cell cycle and T-cell Receptor signaling pathways.

| <b>Antibody</b>                      | <b>Company</b>            | <b>Catalog number</b> | <b>dilution</b> |
|--------------------------------------|---------------------------|-----------------------|-----------------|
| 4EBP1 S65 174A9                      | Cell Signaling Technology | 9456                  | 1:50            |
| Acetyl-CoA Carboxylase 1 S79         | Millipore                 | 04-1009               | 1:1000          |
| AKT S473                             | Cell Signaling Technology | 9271                  | 1:75            |
| AKT T308                             | Cell Signaling Technology | 13038                 | 1:150           |
| AKT TOT                              | R&D                       | MAB1775               | 1:100           |
| ALK Y1604                            | Cell Signaling Technology | 3341                  | 1:100           |
| AMPK $\alpha$ T172                   | Cell Signaling Technology | 2535                  | 1:50            |
| BAX                                  | Cell Signaling Technology | 2772                  | 1:50            |
| BCL-XL                               | Cell Signaling Technology | 2762                  | 1:75            |
| BCL-2 S70                            | Cell Signaling Technology | 2827                  | 1:35            |
| B-RAF S445                           | Cell Signaling Technology | 2696                  | 1:50            |
| C-MYC (9E10)                         | Millipore                 | OP10                  | 1:100           |
| Cleaved CASPASE 7 (D198)             | Cell Signaling Technology | 9491                  | 1:100           |
| CDK2 (78B2)                          | Cell Signaling Technology | 2546                  | 1:50            |
| CK2 $\alpha$                         | Cell Signaling Technology | 2656                  | 1:100           |
| CYCLIN B                             | BD bioscience             | 610220                | 1:100           |
| CYCLIN E                             | BD bioscience             | 51-1459GR             | 1:100           |
| eIF4G S1108                          | Cell Signaling Technology | 2441                  | 1:75            |
| ERK1/2 T202/Y204                     | Cell Signaling Technology | 9101                  | 1:100           |
| FAK Y397                             | BD bioscience             | 611806                | 1:75            |
| GSK3 $\alpha/\beta$ S21-9            | Cell Signaling Technology | 9331                  | 1:500           |
| HSP70/HSP72                          | Enzo Life Science         | ADI-SPA-810           | 1:75            |
| JAK1 Y2022/2023                      | Cell Signaling Technology | 3331                  | 1:50            |
| JAK2 Y1007-1008                      | Cell Signaling Technology | 3771                  | 1:400           |
| LCK TOT (L22B1)                      | Cell Signaling Technology | 2657                  | 1:300           |
| LCK Y505                             | Cell Signaling Technology | 2751                  | 1:50            |
| LKB1 S428                            | Cell Signaling Technology | 3051                  | 1:100           |
| LKB1 TOT (27D10)                     | Cell Signaling Technology | 3050                  | 1:100           |
| MEK1/2 S217/221 (41G9)               | Cell Signaling Technology | 9154                  | 1:200           |
| mTOR S2448                           | NOVUSBIO                  | NBP1-51413            | 1:100           |
| mTOR TOT (L27D4)                     | Cell Signaling Technology | 4517                  | 1:100           |
| NOTCH1 TOT (C37C7)                   | Cell Signaling Technology | 3439                  | 1:100           |
| cleaved NOTCH (D3B8)                 | Cell Signaling Technology | 4147                  | 1:75            |
| p21 Waf1/Cip1 (12D1)                 | Cell Signaling Technology | 2947                  | 1:30            |
| p27 Kip1 (57)                        | BD bioscience             | 610241                | 1:50            |
| p38 T180/Y182 (D3F9)                 | Cell Signaling Technology | 4511                  | 1:100           |
| p53                                  | Cell Signaling Technology | 9282                  | 1:75            |
| p70 S6K T389                         | Cell Signaling Technology | 9205                  | 1:75            |
| PDGFR receptor $\beta$ (Y751) (88H8) | Cell Signaling Technology | 3166                  | 1:1000          |
| PKC1 S241                            | Cell Signaling Technology | 3061                  | 1:100           |
| PIM-1                                | Bethyl                    | A300-313A-T           | 1:75            |
| PKC $\alpha$ S657                    | Millipore                 | 06822                 | 1:400           |
| PKC $\Delta$ T505                    | Cell Signaling Technology | 9374                  | 1:100           |
| PKC $\theta$ T538                    | Cell Signaling Technology | 9377                  | 1:100           |
| PKC $\zeta/\lambda$ T410/403         | Cell Signaling Technology | 9378                  | 1:50            |
| PRAS40 T246                          | BioSource                 | 44-1100               | 1:200           |
| PTEN S380                            | Cell Signaling Technology | 9551                  | 1:100           |

|                 |                           |             |        |
|-----------------|---------------------------|-------------|--------|
| PTEN TOT        | Cell Signaling Technology | 9552        | 1:100  |
| RB S780         | BD bioscience             | 558385      | 1:50   |
| RB TOT          | BD bioscience             | 554136      | 1:100  |
| S6RP S235/236   | Cell Signaling Technology | 2211        | 1:250  |
| SF3b155/SAP155  | Bethyl                    | A300-996A-T | 1:200  |
| SRC Y416        | Cell Signaling Technology | 2101        | 1:50   |
| SRC Y527        | Cell Signaling Technology | 2105        | 1:50   |
| SRSF3           | Abcam                     | ab73891     | 1:200  |
| SRSF6           | Abcam                     | ab140602    | 1:100  |
| STAT1 Y701      | Cell Signaling Technology | 9171        | 1:50   |
| STAT3 S727      | Cell Signaling Technology | 9134        | 1:50   |
| STAT3 Y705      | Cell Signaling Technology | 9145        | 1:50   |
| STAT 5 Y694     | Cell Signaling Technology | 9351        | 1:30   |
| STAT6 Y641      | Millipore                 | 06937       | 1:75   |
| TYK2 Y1054/1055 | Cell Signaling Technology | 9321        | 1:50   |
| USP7            | Bethyl                    | A300-033A-7 | 1:1000 |
| YAP S127        | Abcam                     | Ab76252     | 1:50   |

**Table S4.** Correlations between JAK1/2-STAT6 RPPA phosphorylation intensity levels and patient clinical and biologic characteristics and clinical outcome. Correlations were calculated based on Fisher test.

| OUTCOME                     |      | JAK1/2-STAT6 HIGH | JAK1/2-STAT6 LOW | <i>p</i> -VALUE |
|-----------------------------|------|-------------------|------------------|-----------------|
|                             |      | n = 6             | n = 1            | 0.06347         |
|                             | POOR | n = 6             | n = 1            |                 |
|                             | GOOD | n = 5             | n = 10           |                 |
|                             |      |                   |                  |                 |
| NOTCH1 and/or FBXW7 MUTATED | YES  | n = 6             | n = 6            | 1               |
|                             | NO   | n = 5             | n = 5            |                 |
|                             |      |                   |                  |                 |
| PTEN MUTATED                | YES  | n= 2              | n= 0             | 0.4762          |
|                             | NO   | n= 9              | n= 11            |                 |
|                             |      |                   |                  |                 |
| STAGE                       | IV   | n = 3             | n = 5            | 0.6594          |
|                             | III  | n = 8             | n = 6            |                 |

**Table S5. Combination index (CI) in ALL-SIL, MOLT-4 and RPMI-8402 GC resistant cell lines (MTT test).** CIs were calculated at the reported concentration of (A) AS1517499 at scalar dose and dexamethasone at fixed dose of 10  $\mu$ M for ALL-SIL and 50  $\mu$ M for MOLT-4. (B) ruxo:dex both at scalar dose with a ratio 10:1 by the Bliss Independence model<sup>24</sup>. Synergy, additivity and antagonism are defined by a CI<1, CI=1 or CI>1, respectively.

| A                 |                   |                          |           |
|-------------------|-------------------|--------------------------|-----------|
| AS1517499 $\mu$ M | Combination Index |                          |           |
|                   | ALL-SIL           | MOLT-4                   |           |
| 0.01              | 1.97              | 0.326                    |           |
| 0.1               | 0.989             | 0.942                    |           |
| 1                 | 0.801             | 0.897                    |           |
| B                 |                   |                          |           |
| ruxo: dex $\mu$ M | ALL-SIL           | Combination Index MOLT-4 | RPMI-8402 |
| 12.5/1.25         | 0.762             | 0.640                    | 1.263     |
| 25/2.5            | 0.739             | 0.465                    | 0.474     |
| 50/5              | 0.833             | 0.637                    | 0.536     |
| 100/10            | 0.855             | 0.847                    | 0.529     |

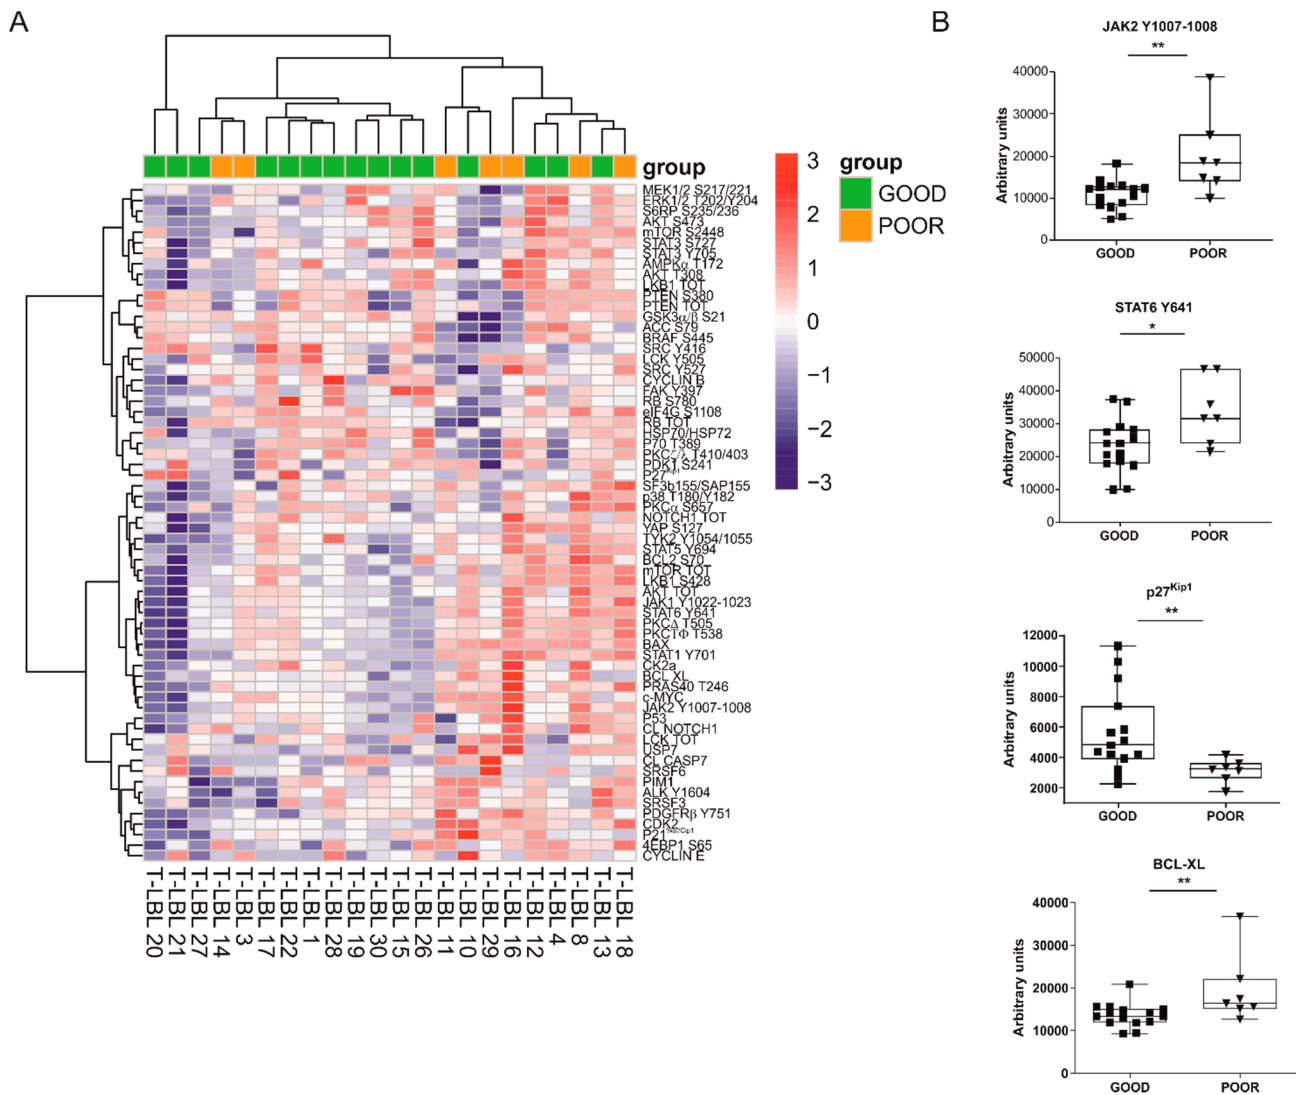

**Figure S1.** RPPA results. **(A)** Hierarchical cluster analysis with Ward's method of 64 proteins belonging to the most de-regulated pathways in cancer analyzed by RPPA in T-LBL pediatric patients with poor prognosis (orange) and good prognosis (green). **(B)** JAK2 Y1007-1008, STAT6 Y641 and BCL-XL measured by RPPA analysis are downregulated in patients with good prognosis (n =15) compared to patients with worse prognosis (n =7), whereas p27<sup>kip1</sup> is upregulated in good prognosis compared to poor prognosis patients.



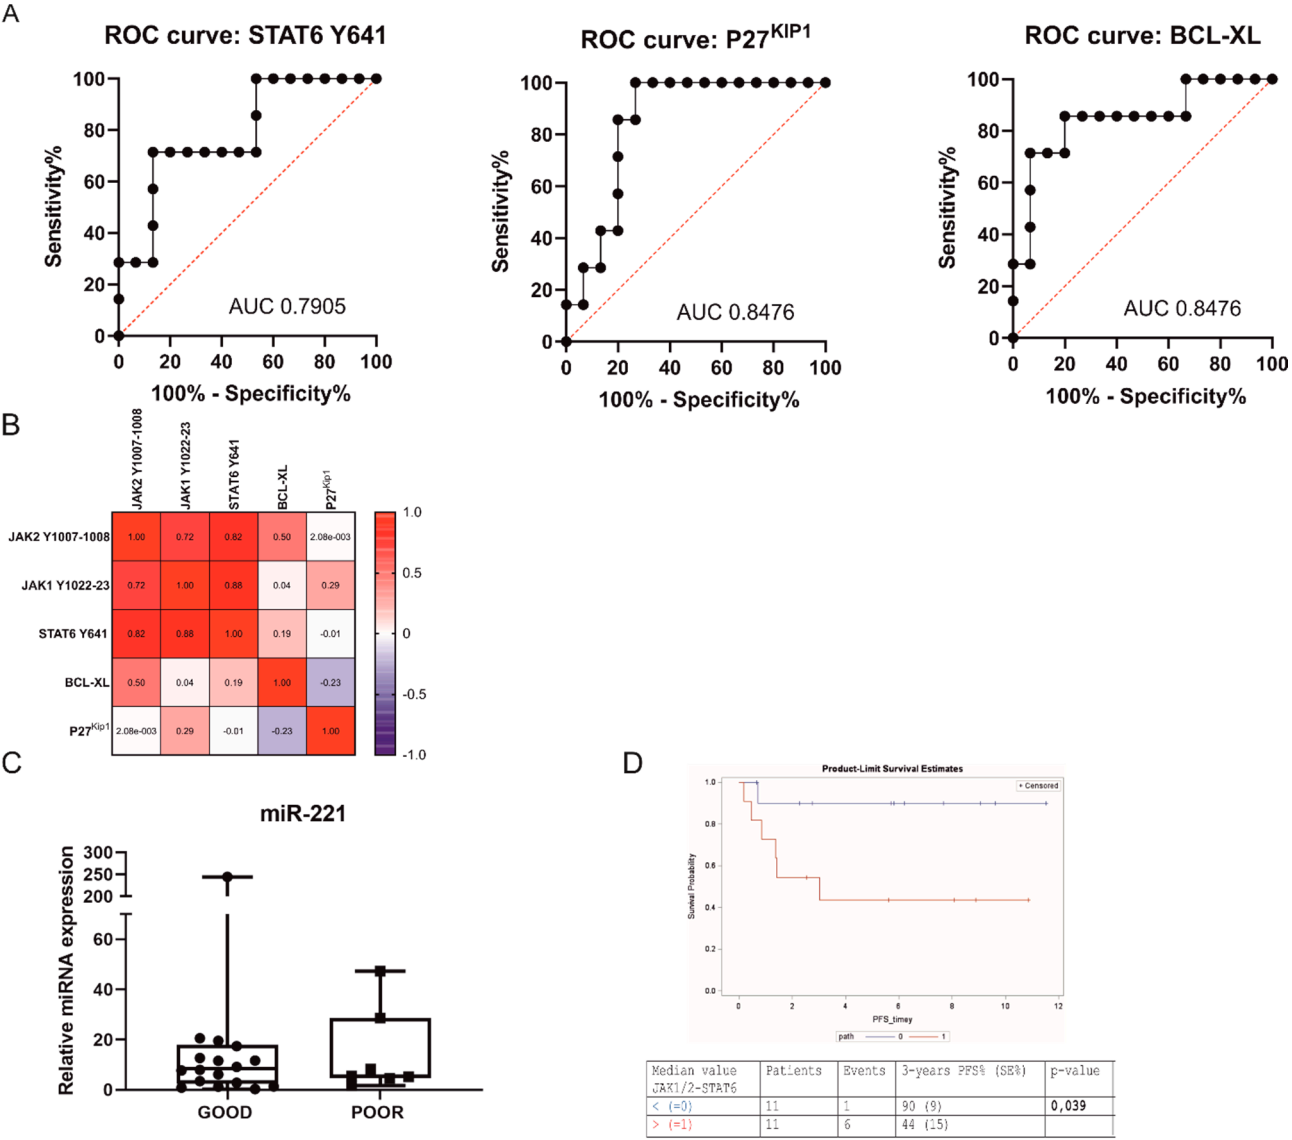

**Figure S2.** Evaluation of potential biomarkers of prognosis at diagnosis in T-LBL patients and protein correlation matrix (A) ROC analysis of the signal intensities obtained by RPPA in T-LBL pediatric patients at diagnosis for STAT6 Y641, BCL-XL and p27<sup>Kip1</sup>. (B) Correlation matrix between the most significant proteins belonging to the JAK1/2-STAT6 pathway (plotted  $\rho$  values). (C) Box-and-whisker plots showing the distribution of *miR-221* expression. Median values between T-LBL patients with good and poor prognosis are not significantly different, based on nonparametric test. (D) T-LBL patients stratification for the Progression Free Survival (PFS) based on the median JAK1/2-STAT6 activation value (0= below; 1= above).

A

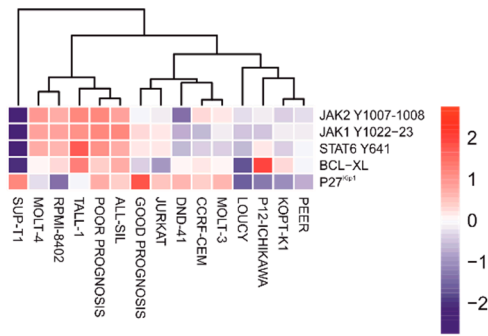

B

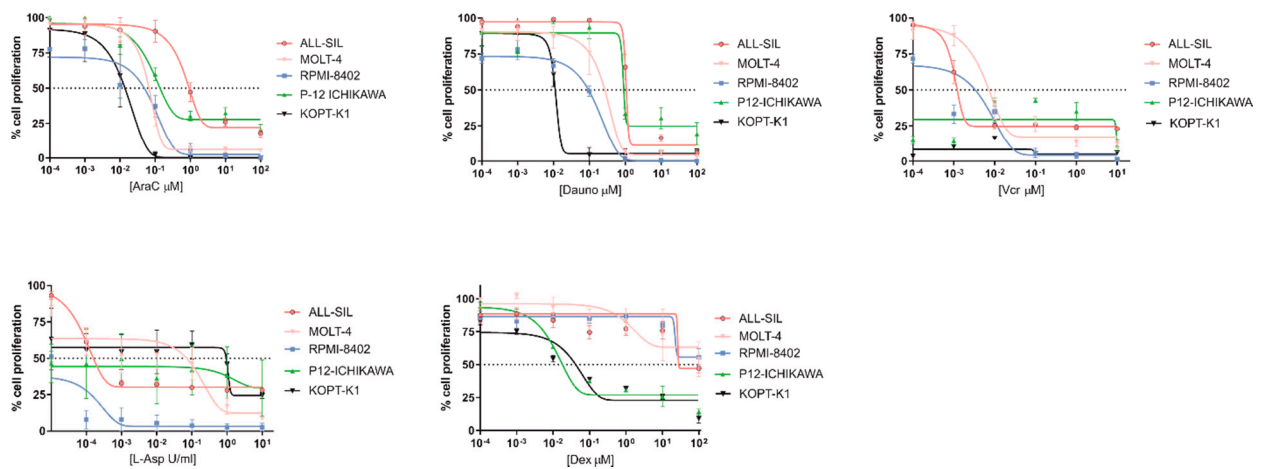

**Figure S3.** Selection of the *in vitro* model and sensitivity of selected cell lines to the conventional chemotherapeutic compounds. (A) Unsupervised hierarchical clustering analysis using the Ward's method and heat map expression levels of proteins belonging to JAK1/2-STAT6 pathway in 13 T-LBL/T-ALL cell lines and in the 2 subgroups of T-LBL patients. Specifically, we plotted the mean RPPA value for good prognosis (n=15) and poor prognosis (n=7) T-LBL patients for each considered protein. (B) Cell proliferation of ALL-SIL, MOLT-4, RPMI-8402, KOPT-K1 and P12-ICHIKAWA cells after treatment for 48 hours with dexamethasone, AraC, vincristine, daunorubicin and L-Asparaginase. All experiments were performed at least 3 times, and data are represented as mean  $\pm$  SEM.

### P12-ICHIKAWA

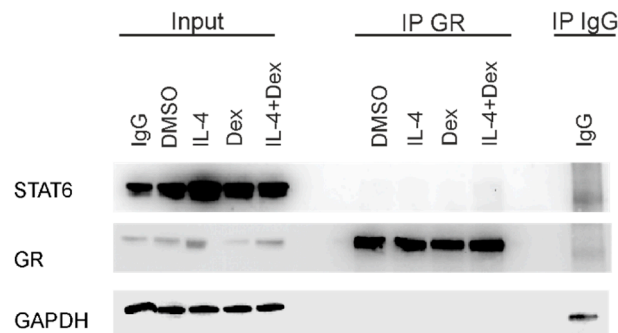

**Figure S4.** Uncropped images of co-immunoprecipitation of GR and STAT6 protein in P12-ICHIKAWA cells treated with DMSO, IL-4, dexamethasone or the combination of IL-4 and dexamethasone. GAPDH was used as loading control for the input. On the right the IP with the IgG control.

A

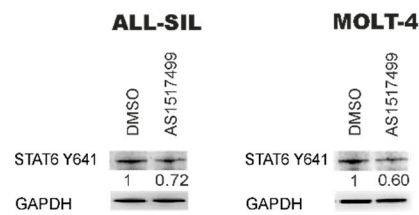

B

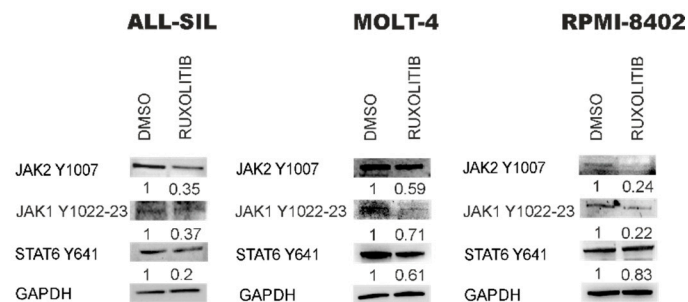

**Figure S5.** JAK1/2-STAT6 levels after AS1517499 or ruxolitinib treatment in ALL-SIL, MOLT-4 and RPMI-8402. **(A)** WB analysis of the decreased phosphorylation of STAT6 Y641 after 5 minutes of treatment with DMSO or AS1517499 at the concentration corresponding to the  $GI_{50}$  in ALL-SIL and MOLT-4 cell lines. **(B)** WB analysis of JAK2 Y1007, JAK1 Y1022-23 and STAT6 Y641 phosphorylation levels in ALL-SIL, MOLT-4 and RPMI-8402. Cells were treated with DMSO only or ruxolitinib for 2 hours at the compound concentrations corresponding to the  $GI_{50}$  at 48 hours.

### Western Blot uncropped images

Figure 2C, STAT6 Y641 in KOPT-K1 cell line after IL-4 and IL-13 stimulation

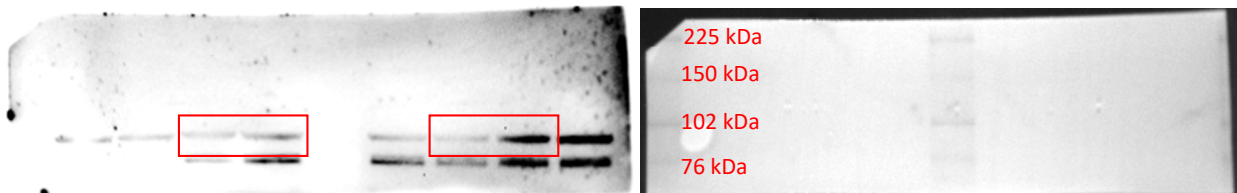

Figure 2C, STAT6 in KOPT-K1 cell line after IL-4 and IL-13 stimulation

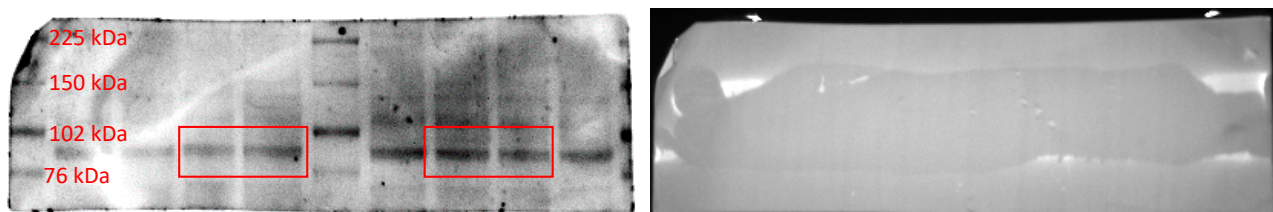

Figure 2C, STAT5 Y694 in KOPT-K1 cell line after IL-4 and IL-13 stimulation

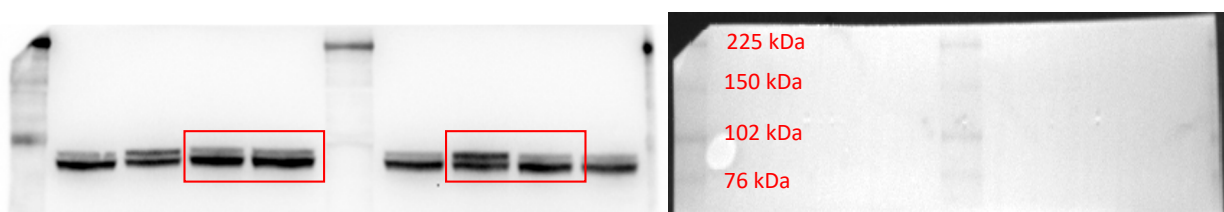

Figure 2C, STAT5 in KOPT-K1 cell line after IL-4 and IL-13 stimulation

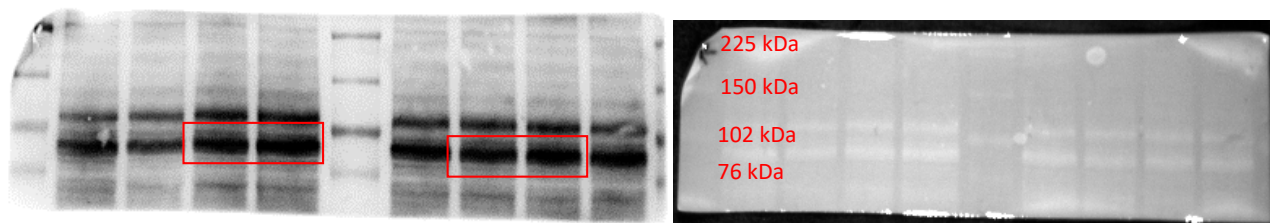

Figure 2C, STAT3 Y705 in KOPT-K1 cell line after IL-4 and IL-13 stimulation

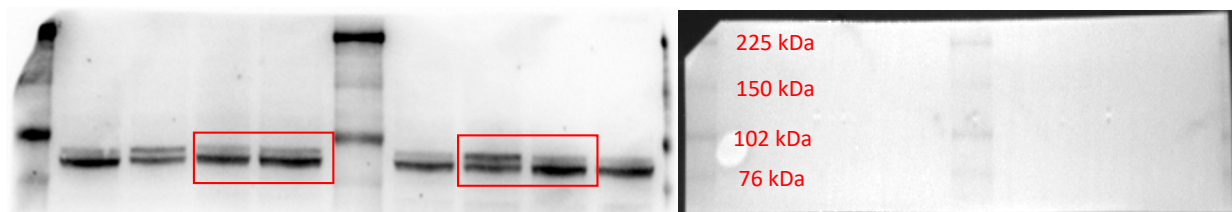

Figure 2C, STAT3 in KOPT-K1 cell line after IL-4 and IL-13 stimulation

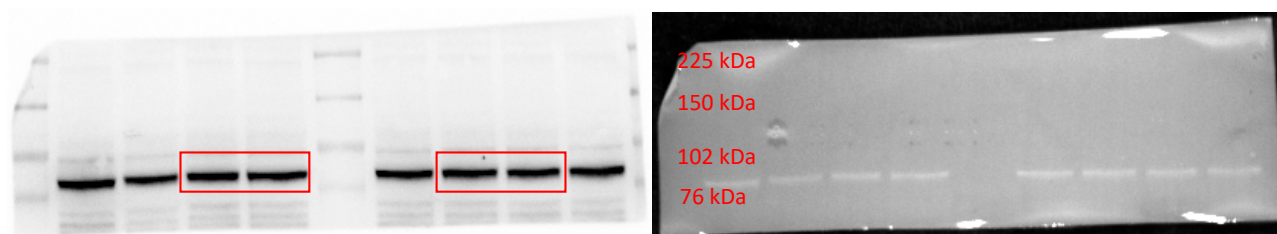

Figure 2C, GAPDH in KOPT-K1 cell line after IL-4 and IL-13 stimulation

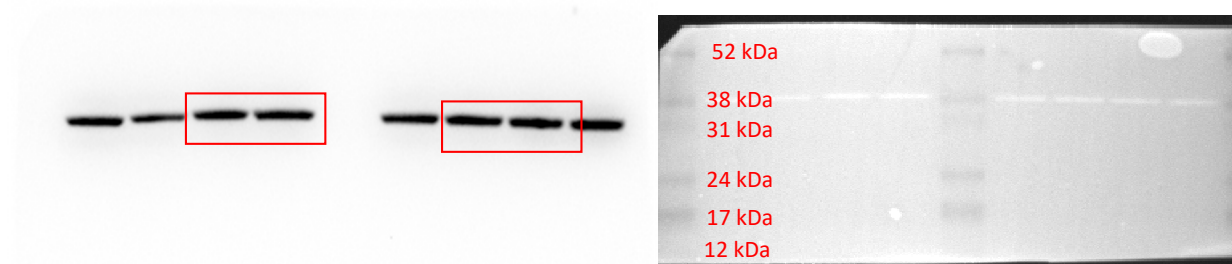

Figure 2C, STAT6 Y641 in P12-ICHIKAWA\_cell line after IL-13 stimulation

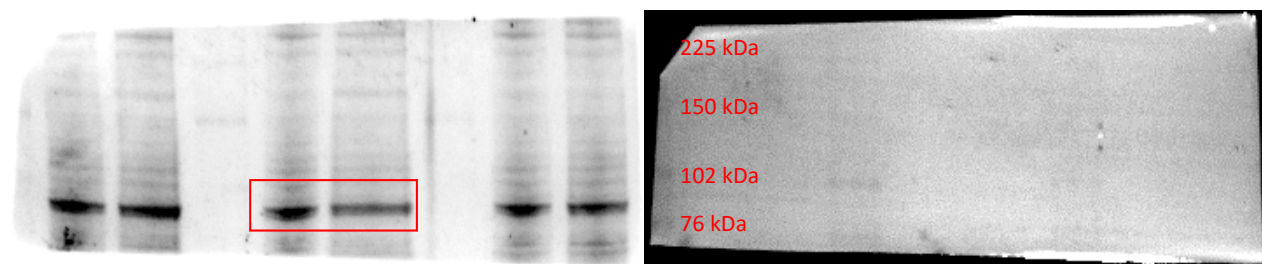

Figure 2C, STAT6 in P12-ICHIKAWA\_cell line after IL-13 stimulation

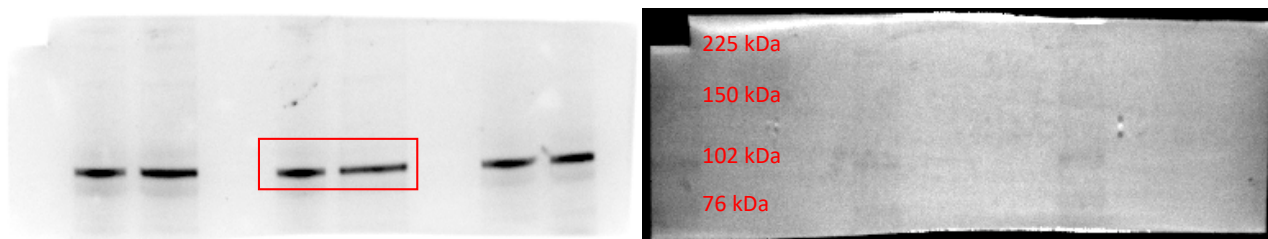

Figure 2C, STAT5 Y694 in P12-ICHIKAWA\_cell line after IL-13 stimulation

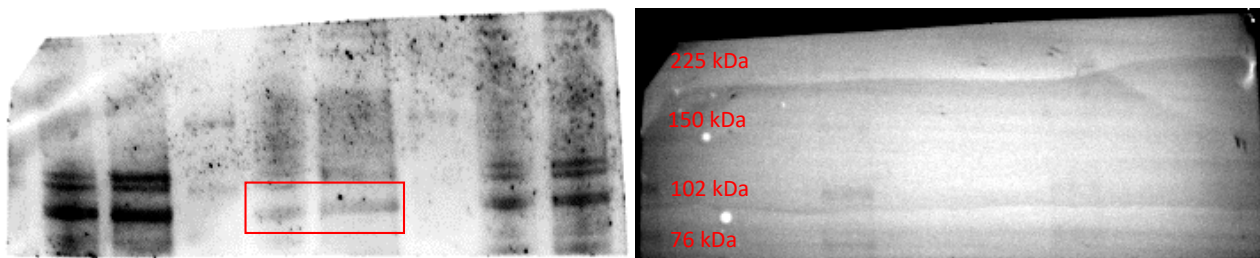

Figure 2C, STAT5 in P12-ICHIKAWA\_cell line after IL-13 stimulation

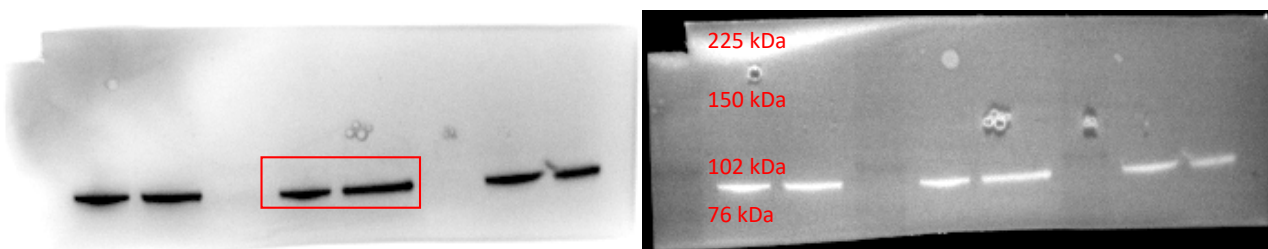

Figure 2C, STAT3 Y705 in P12-ICHIKAWA\_cell line after IL-13 stimulation

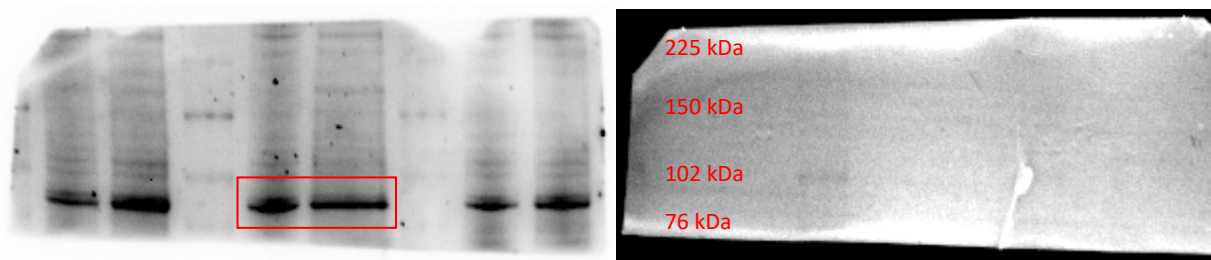

Figure 2C, STAT3 in P12-ICHIKAWA\_cell line after IL-13 stimulation

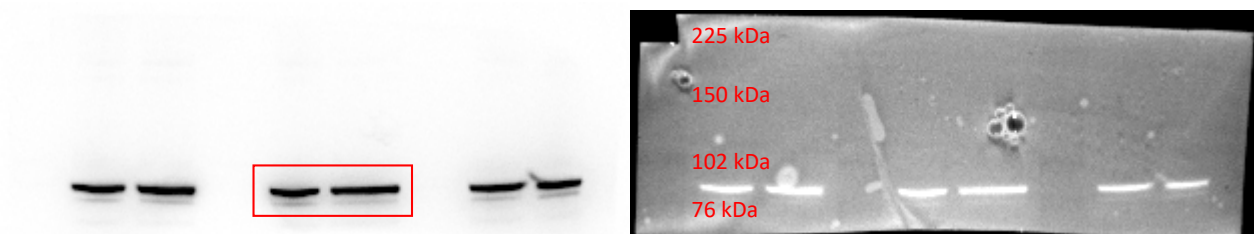

Figure 2C, GAPDH in P12-ICHIKAWA\_cell line after IL-13 stimulation



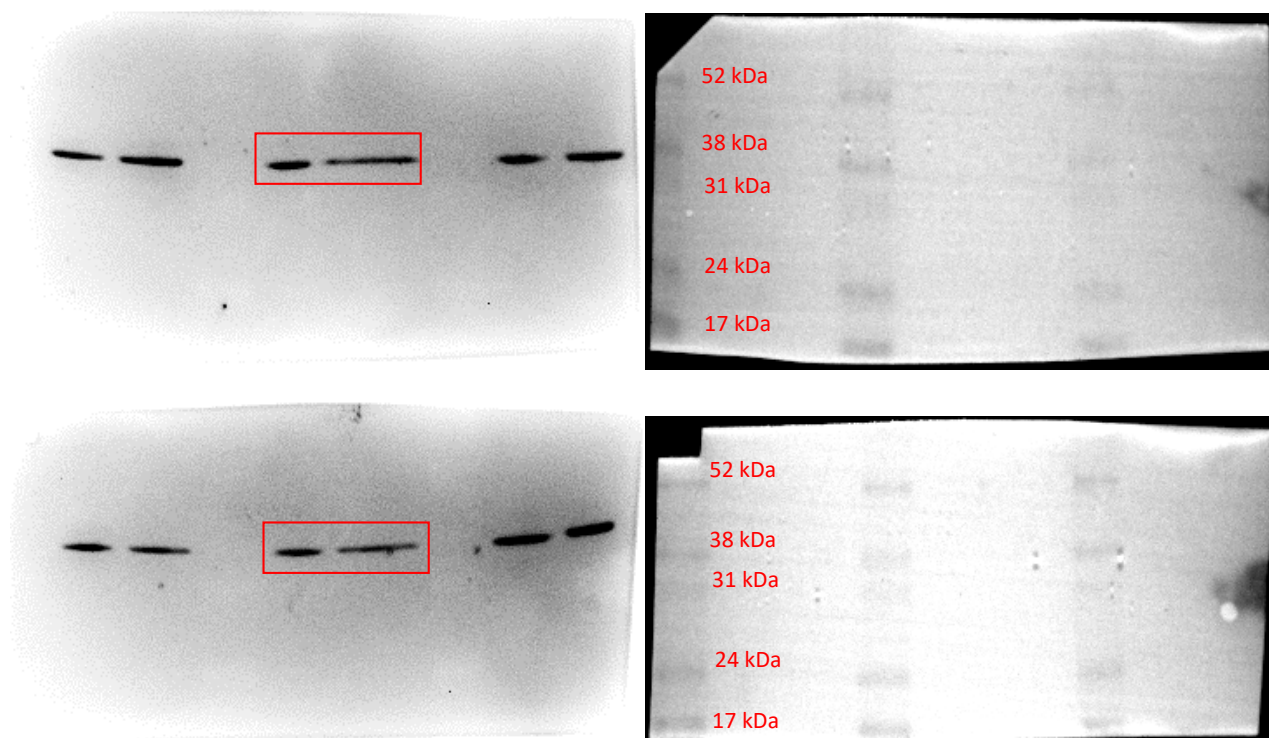

Figure 2C, STAT6 Y641 in P12-ICHIKAWA\_cell line after IL-4 stimulation

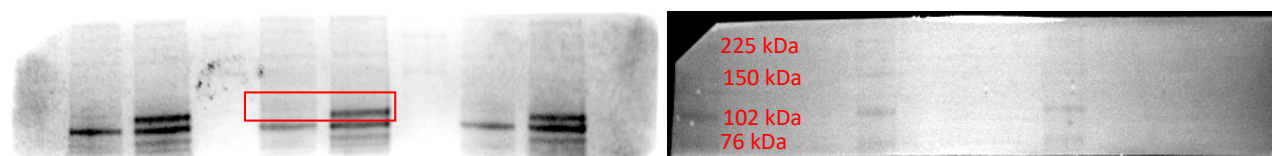

Figure 2C, STAT6 in P12-ICHIKAWA\_cell line after IL-4 stimulation

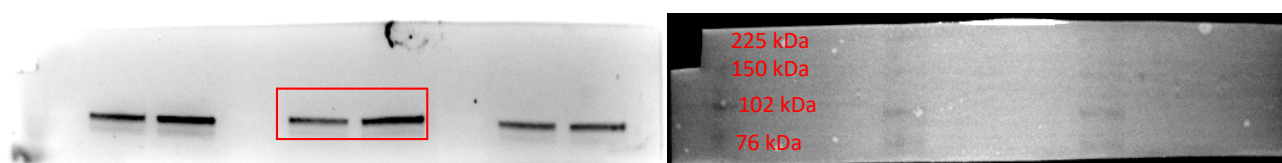

Figure 2C, STAT5 Y694 in P12-ICHIKAWA\_cell line after IL-4 stimulation

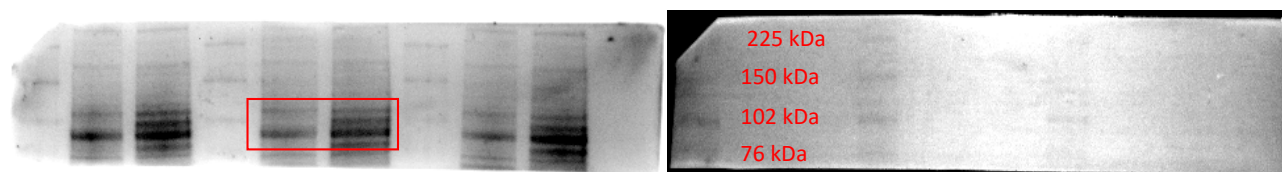

Figure 2C, STAT5 in P12-ICHIKAWA\_cell line after IL-4 stimulation

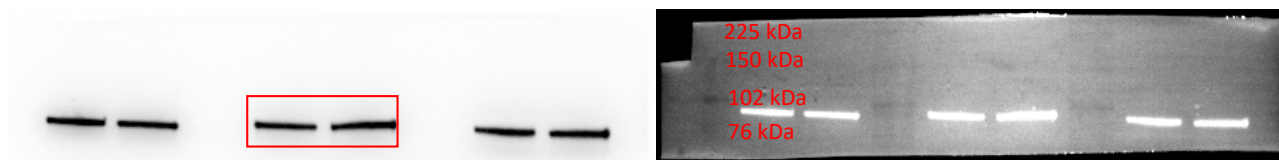

Figure 2C, STAT3 Y705 in P12-ICHIKAWA\_cell line after IL-4 stimulation

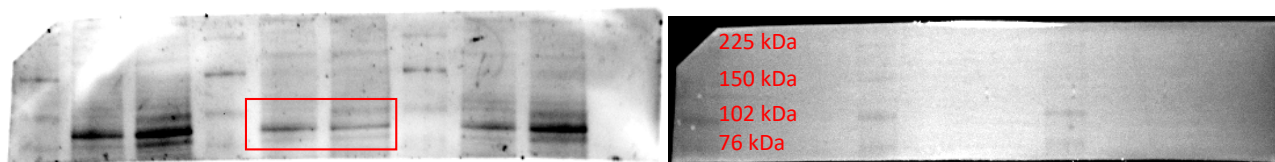

Figure 2C, STAT3 in P12-ICHIKAWA\_cell line after IL-4 stimulation

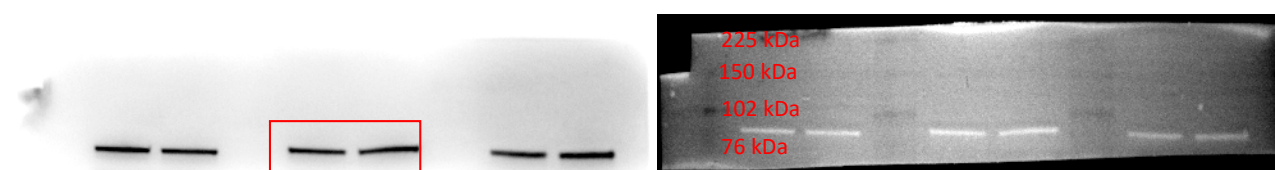

Figure 2C, GAPDH in P12-ICHIKAWA\_cell line after IL-4 stimulation

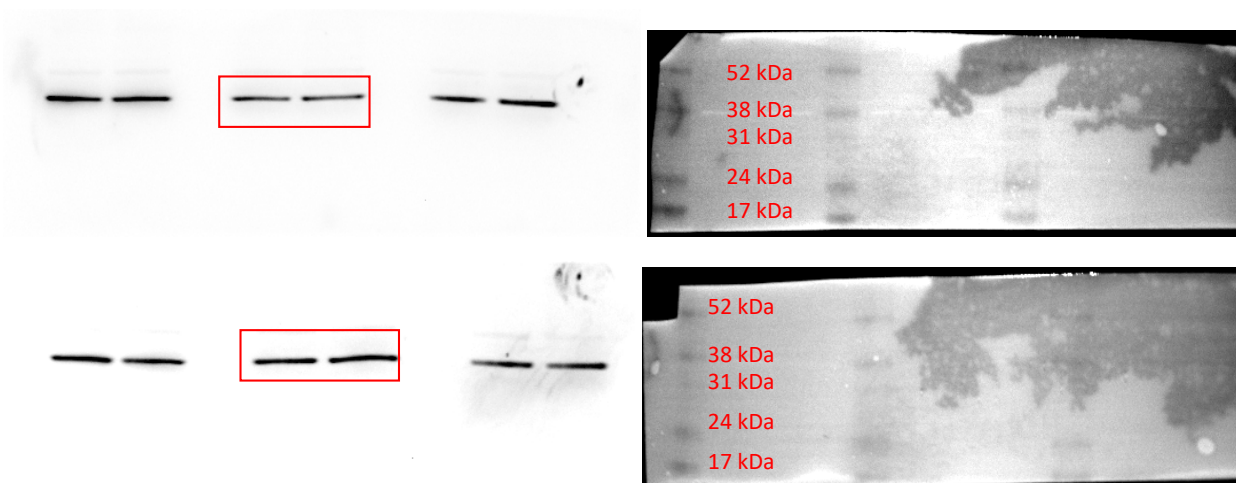

Figure 3A and S4, STAT6 level in after immunoprecipitation in P12-ICHIKAWA cells treated with DMSO, IL-4 alone, dexamethasone alone, or the combination of IL-4 and dexamethasone.

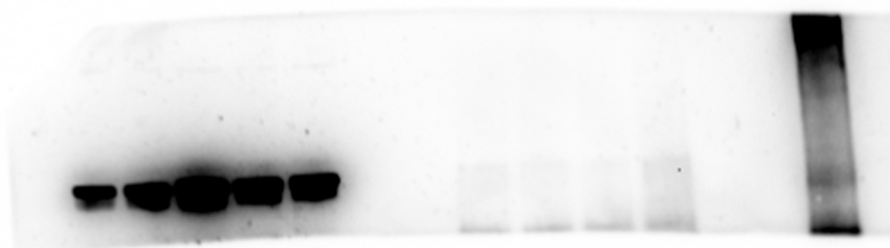

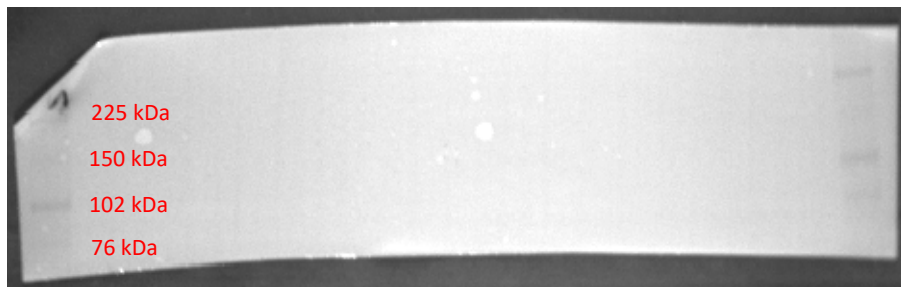

Figure 3A and S4, GR level in P12-ICHIKAWA cell line after immunoprecipitation in P12-ICHIKAWA cells treated with DMSO, IL-4 alone, dexamethasone alone, or the combination of IL-4 and dexamethasone.

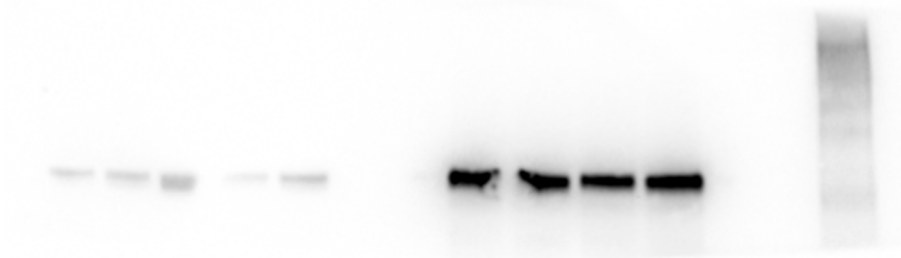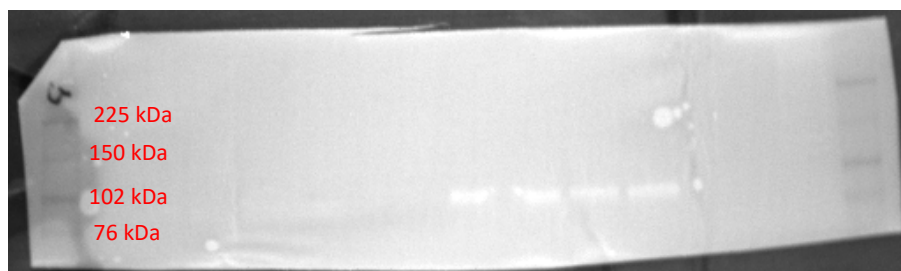

Figure 3A and S4, GAPDH in P12-ICHIKAWA cell line after immunoprecipitation in P12-ICHIKAWA cells treated with DMSO, IL-4 alone, dexamethasone alone, or the combination of IL-4 and dexamethasone.

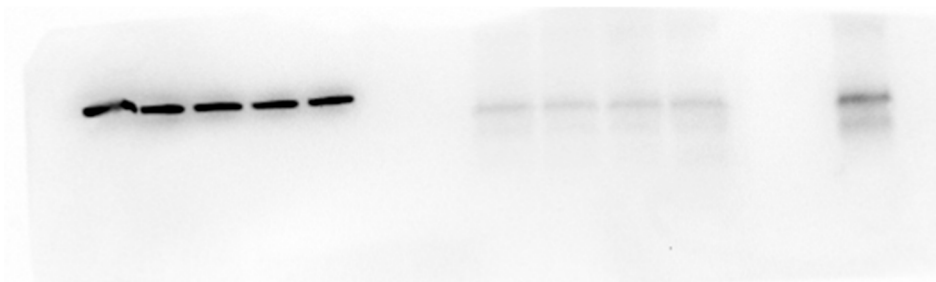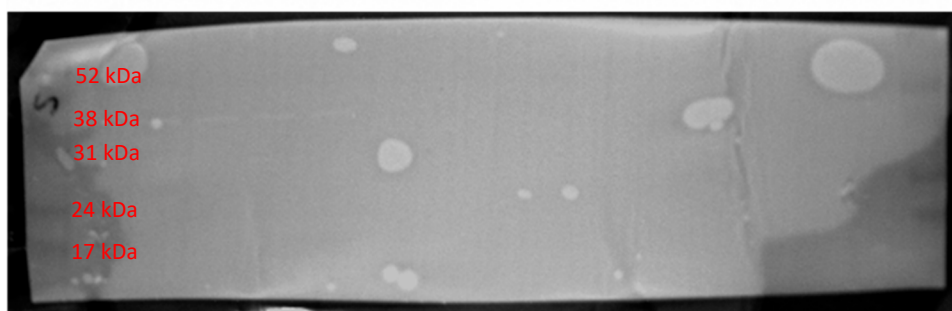



Figure 3C, STAT6 level in P12-ICHIKAWA cell line after STAT6 specific silencing

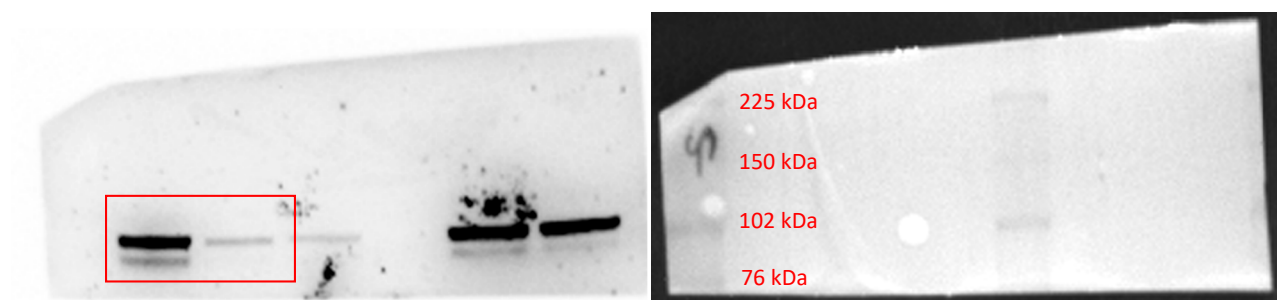

Figure 3C, GAPDH level in P12-ICHIKAWA cell line after STAT6 specific silencing

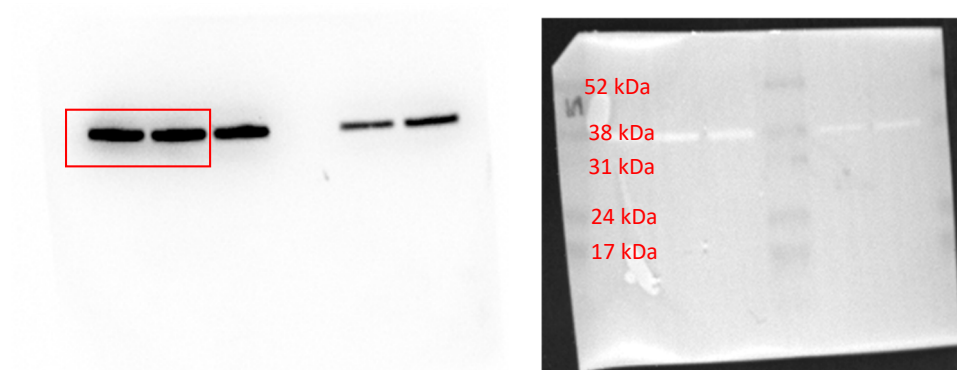

Figure 4A, STAT6 level in ALL-SIL cell line after STAT6 specific silencing

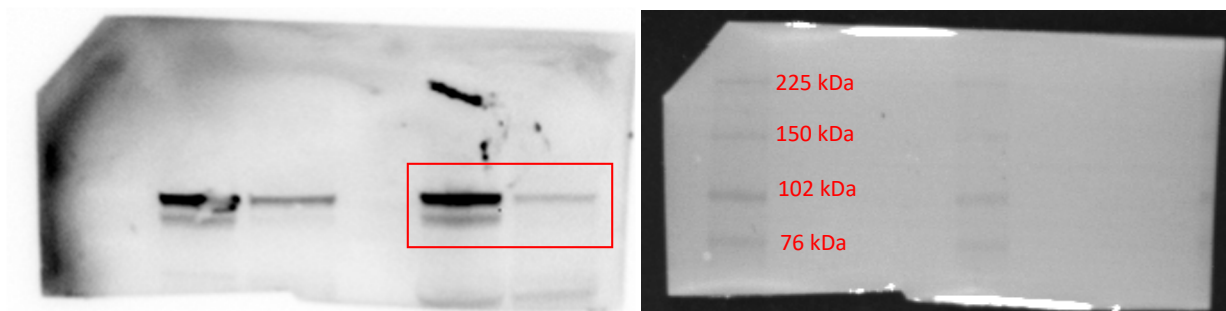

Figure 4A, GAPDH level in ALL-SIL cell line after STAT6 specific silencing

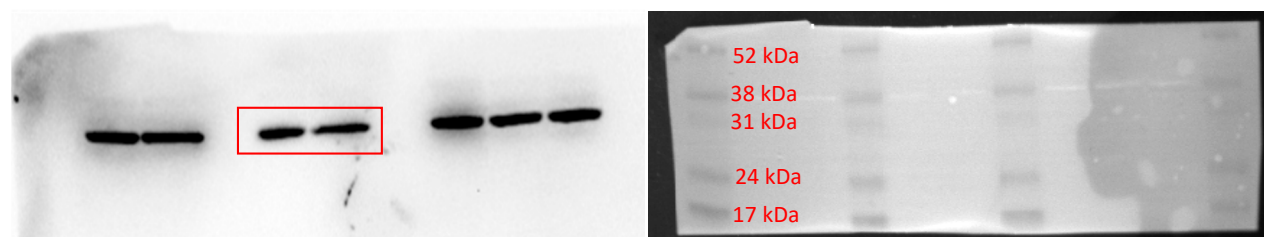

Figure S5, STAT6 Y641 level in ALL-SIL cell line after AS1517499 treatment

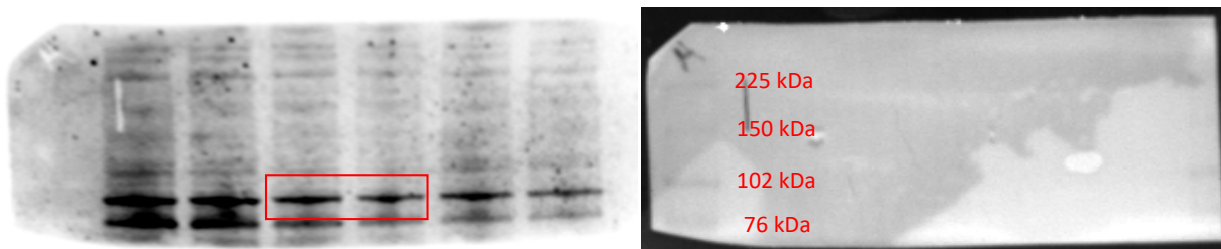

Figure S5, STAT6 Y641 level in MOLT-4 cell line after AS1517499 treatment

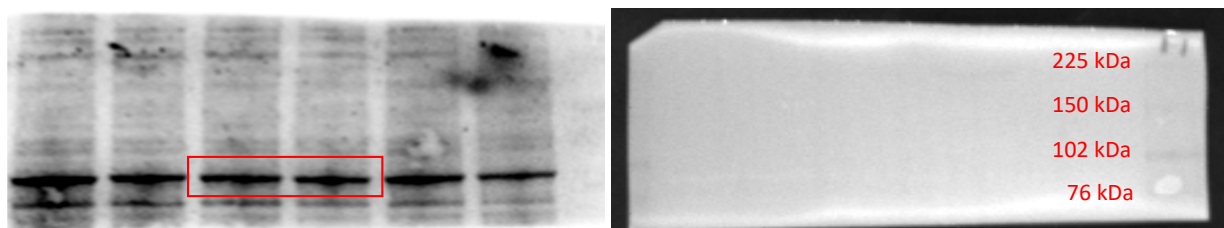

Figure S5, GAPDH level in ALL-SIL and MOLT-4 cell line after AS1517499 treatment

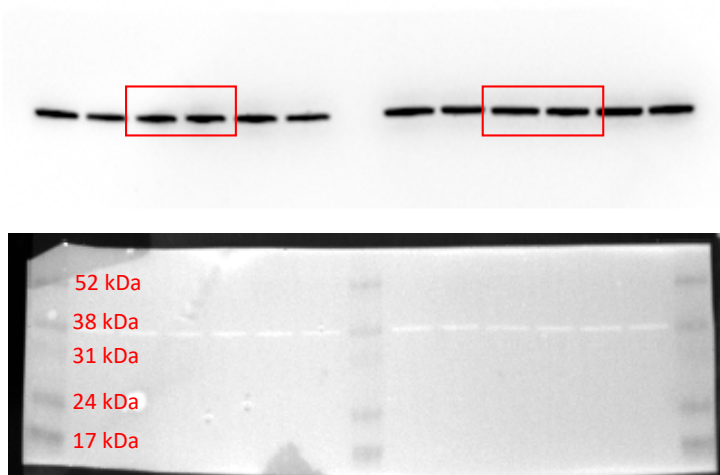

Figure S5, JAK2 Y1007, JAK1 Y1022-23 and STAT6 Y641 level in ALL-SIL cell line after Ruxolitinib treatment

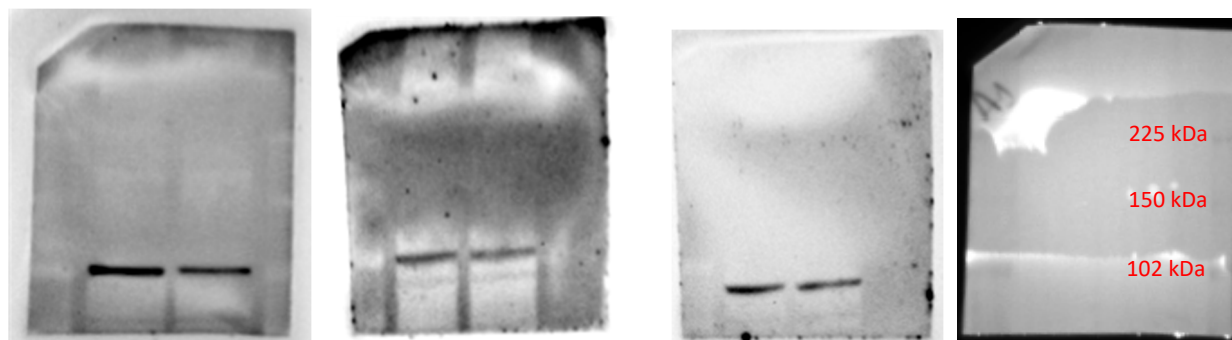

Figure S5, GAPDH level in ALL-SIL cell line after Ruxolitinib treatment

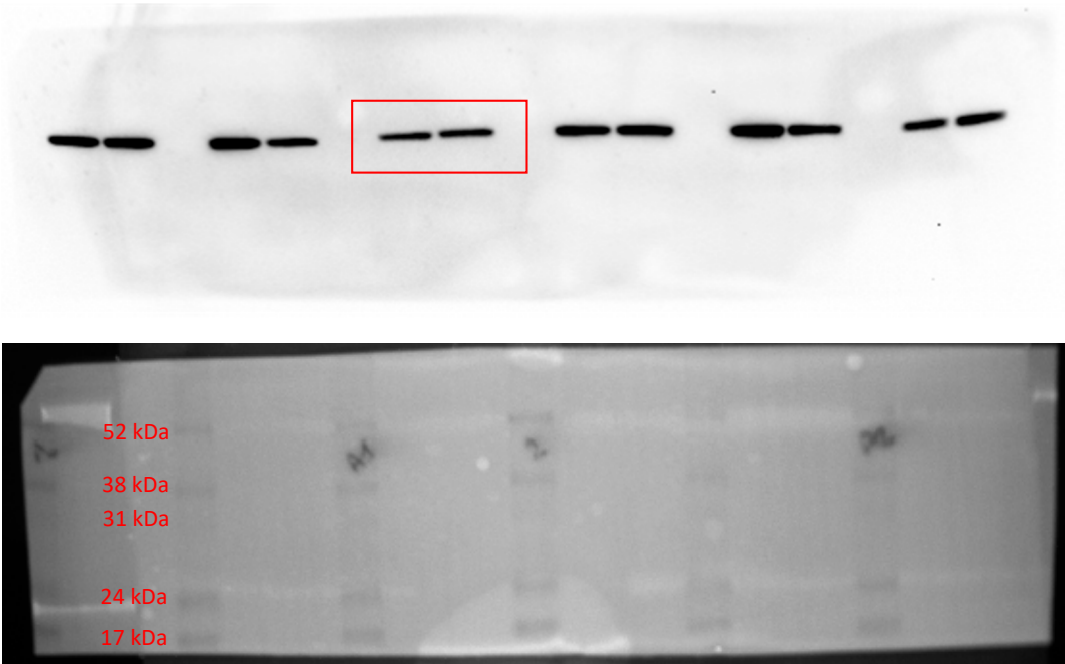

Figure S5, JAK2 Y1007, JAK1 Y1022-23 and STAT6 Y641 level in MOLT-4 cell line after Ruxolitinib treatment

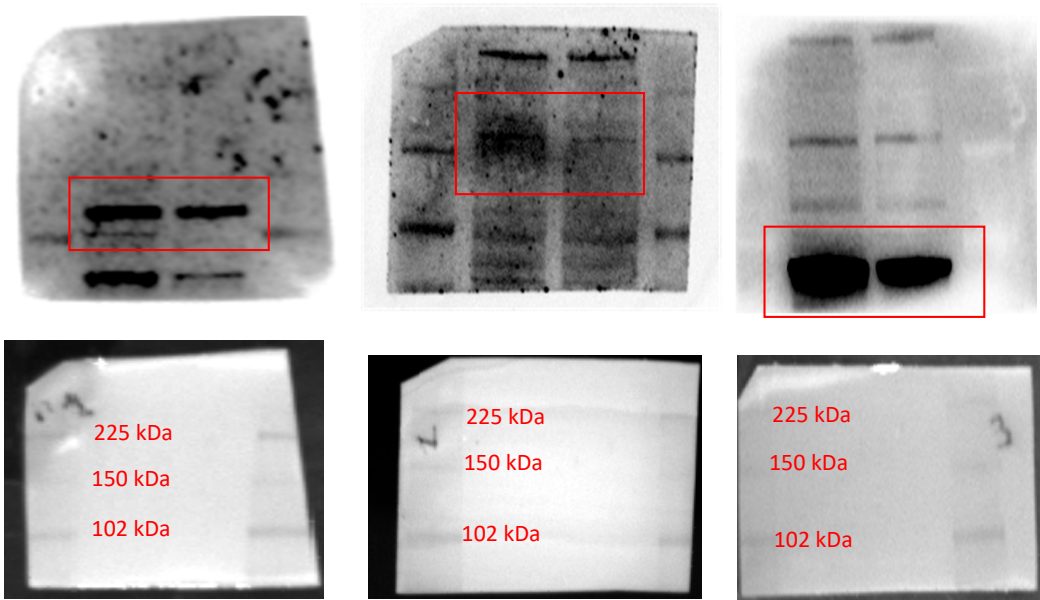

Figure S5, GAPDH level in MOLT-4 cell line after Ruxolitinib treatment

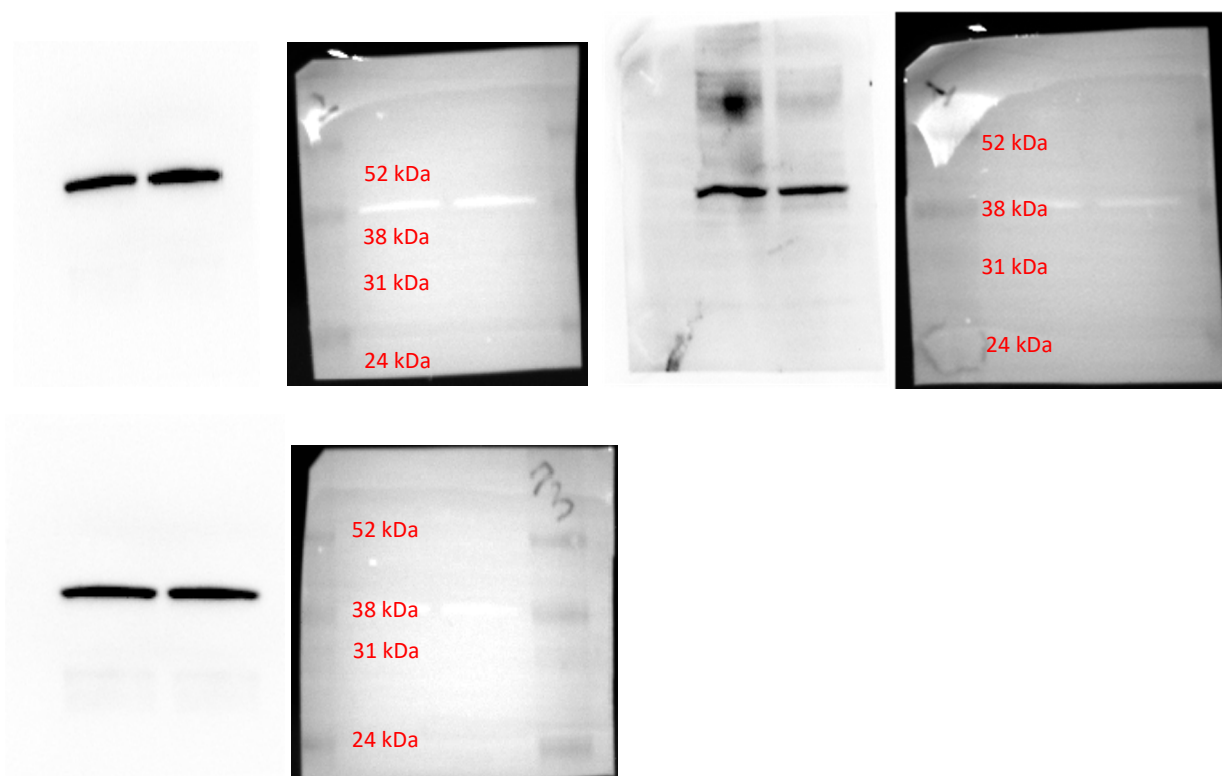

Figure S5, JAK2 Y1007, JAK1 Y1022-23 and STAT6 Y641 level in RPMI-8402 cell line after Ruxolitinib treatment

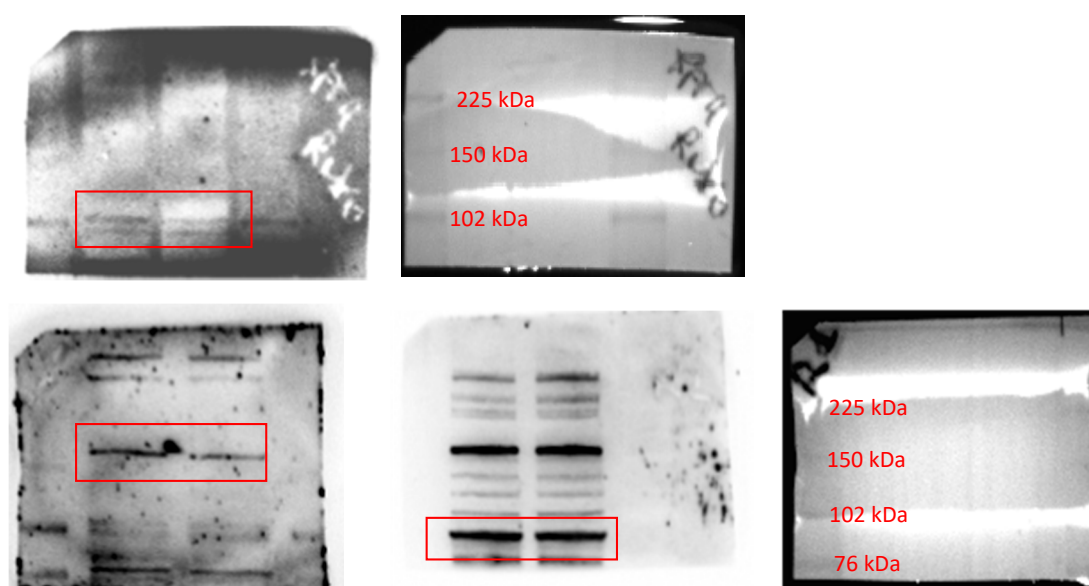

Figure S5, GAPDH level in RPMI-8402 cell line after Ruxolitinib treatment

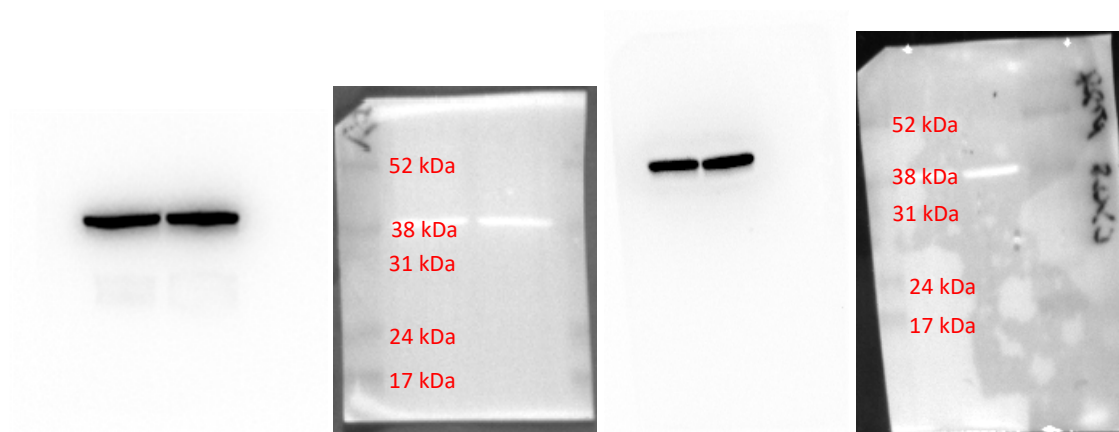

**Figure S6.** uncropped original western blot.
